# Supplementary material for: Assessment of the Level of Accumulation of the dIFN Protein Integrated by the Knock-In Method into the Region of the Histone H3.3 Gene of Arabidopsis thaliana
Source: MDPI journal article supplement (doi:10.3390/cells10082137), 2021-08-19
Supplement: s1 [file s1]

## Supplementary

**Table S1.** Oligonucleotides used in the work.

| Oligonucleotide          | Nucleotide sequence                                      | Gene or sequence                                                  | Received fragment size |
|--------------------------|----------------------------------------------------------|-------------------------------------------------------------------|------------------------|
| 1_gRNA_H Up              | GATTCGGCCTAAACTAAATCCGAA                                 | Sequence for guide RNA                                            |                        |
| 1_gRNA_H Lo              | AAACTTCGGATTTAGTTTAGGCCG                                 |                                                                   |                        |
| npt1                     | CGACGTTGTCACTGAAGCG                                      | <i>nptII</i> marker gene                                          | 487                    |
| npt2                     | AAGCACGAGGAAGCGGTCAG                                     |                                                                   |                        |
| Up_H3.3                  | TAGGCAACGATGGTAAAGCGGATT                                 | Testing the site-specific integration                             | 630/1048               |
| Up_H3.3_1                | AATCGCATAATCAAGAAAATCAAAACCC                             |                                                                   |                        |
| Lo_plan3                 | AGCCGAATAGCCTCTCCACCCAA                                  |                                                                   |                        |
| dIFN 1                   | GATGTAGCGGATAATGGAACCTCTTT                               | <i>dIFN</i> target gene                                           | 478                    |
| dIFN 2                   | TGACTCCTTTTTTCGCTTCCCTG                                  |                                                                   |                        |
| VAP27-1_f                | AACAAGACAAATAGCGATGTCCCA                                 | 12kDa gene of microsomal signal peptidase from <i>A. thaliana</i> |                        |
| VAP27-1_r                | GCGATTAGATTTCGTCCCGTGA                                   |                                                                   |                        |
| VAP27-1_p                | [R6G]CACCGTCTCCGGTTCAGAGAGAG[BHQ2]                       |                                                                   |                        |
| HIS3.3_f                 | CGGTGATCGTGAACTACTGGAAT                                  | Histone H3.3 gene from <i>A. thaliana</i>                         |                        |
| HIS3.3_r                 | CGGAAGATCATTTCGGCGAAG                                    |                                                                   |                        |
| HIS3.3_p                 | [ROX]CGCTCGATAGGTGGTACGAAATTAGG[BHQ2]                    |                                                                   |                        |
| PARP2_f                  | GGTGTTTCGTGTAGGTGGAGAGG                                  | PARP2-gene from <i>A. thaliana</i>                                |                        |
| PARP2_r                  | CCTCTTGCTCTTTGATTCTTCCTTC                                |                                                                   |                        |
| PARP2_p                  | [Cy5]CTTGAAGAGGCTATCGCAGAAGACA[BHQ2]                     |                                                                   |                        |
| Up_sig.BglII(62)         | CCCAGATCTATGGAAGAATTGCTAGAGGC                            | Primers used to create constructs                                 |                        |
| Lo_dIFN(60)              | CTGGGATGCTCTTCGACCT                                      |                                                                   |                        |
| ifn+Up_GST(60)           | AGGTGGAAGAGCATCCCAGATGTCCCCTATACTAGGTTATT                |                                                                   |                        |
| Lo_GST(GEX)stop A65I(66) | CCCGGTACCTTAACCACCAAACGTGGCTTGCCA                        |                                                                   |                        |
| Up_L_HIII                | CCCAAGCTTCGAGCGATTCCAGTAGTTTCACGA                        |                                                                   |                        |
| Lo_L_Acc_Sfr             | GGTACCAGAGTAATCTCGAGTTTATTTTCAGCGATCCGCGACG              |                                                                   |                        |
| Up_R_Sfr_Acc             | CTCGAGATTACTCTGGTACCTTCGGATTTAGTTTAGGCCGTCACA            |                                                                   |                        |
| Lo_R_Sal                 | CCCGTCGACCATCATCATCCTAAACGACGCCG                         |                                                                   |                        |
| Lo_A-B_pBI(58)           | CGAAGGTACCGGATGGATCCCGTGTTCTCTCCAATGAAAT                 |                                                                   |                        |
| Up_Xho-pBI(60)           | AATCTCGAGGATCATGAGCGGAGAATTAAG                           |                                                                   |                        |
| Up_L_HIII_gRNA           | CCCAAGCTTCGGCCTAAACTAAATCCGAACGGCGAGCGATTCCAGTAGTTTCACGA |                                                                   |                        |
| Lo_R_Sal_gRNA            | CCCGTCGACGGCCTAAACTAAATCCGAACGGCATCATCATCCTAAACGACGCCG   |                                                                   |                        |
| Up_Sal_gRNA-pBI(60):     | CCCGTCGACCCGTTTCGGATTAGTTTAGGCCGGATCATGAGCGGAGAATTAAG    |                                                                   |                        |

|                         |                                                           |  |  |
|-------------------------|-----------------------------------------------------------|--|--|
| Lo_A-B_pBI(58)          | CGAAGGTACCGGATGGATCCCGTGTCTCTCCA<br>AATGAAAT              |  |  |
| Lo_Acc_gRNA_G<br>ST(60) | CGAAGGTACCCCGTTCGGATTTAGTTTAGGCCG<br>ACCACCAAACGTGGCTTGCC |  |  |

**Figure S1.** Alignment of nucleotide sequences of PCR fragments obtained with primers UpH3.3\_1 and Lo\_plan3 from *A. thaliana* cell lines with knock-ins (lines 1, 6, 38 and 4) with DNA sequence of genetic construct pIFN(H3.3).3.

|              |       |                                                    |                      |                |
|--------------|-------|----------------------------------------------------|----------------------|----------------|
|              |       | 620                                                |                      | 669            |
| 1 A.th       | (143) | GCTTTCTTGACCAATTCAACGGTCCAGATCTAGCTTTACTGGTTTGACG  |                      |                |
| 6 A.th       | (550) | GCTTTCTTGACCAATTCAACGGTCCAGATCTAGCTTTACTGGTTTGACG  |                      |                |
| 38 A.th      | (617) | GCTTTCTTGACCAATTCAACGGTCCAGATCTAGCTTTACTGGTTTGACG  |                      |                |
| 4 A.th       | (557) | GCTTTCTTGACCAATTCAACGGTCCAGATCTAGCTTTACTGGTTTGACG  |                      |                |
| pIFN(H3.3).3 | (307) | GCTTTCTTGACCAATTCAACGGTCCAGATCTAGCTTTACTGGTTTGACG  |                      |                |
|              |       | 670                                                |                      | 719            |
| 1 A.th       | (193) | AGGATCACCCTGCTACATAATTGATTGCTATTGGCTGAATACAAACCGT  |                      |                |
| 6 A.th       | (600) | AGGATCACCCTGCTACATAATTGATTGCTATTGGCTGAATACAAACCGT  |                      |                |
| 38 A.th      | (667) | AGGATCACCCTGCTACATAATTGATTGCTATTGGCTGAATACAAACCGT  |                      |                |
| 4 A.th       | (607) | AGGATCACCCTGCTACATAATTGATTGCTATTGGCTGAATACAAACCGT  |                      |                |
| pIFN(H3.3).3 | (357) | AGGATCACCCTGCTACATAATTGATTGCTATTGGCTGAATACAAACCGT  |                      |                |
|              |       | 720                                                |                      | 769            |
| 1 A.th       | (243) | CGCGGATCGCTGAAATAAA                                | CGTTCGGGATTTAGTTTAGG | CGG--GATCA     |
| 6 A.th       | (650) | CGCGGATCGCTGAAATAAA                                | -----                | GGCCG--GATCA   |
| 38 A.th      | (717) | CGCGGATCGCTGAAATAAA                                | -----                | TCGACCG--GATCA |
| 4 A.th       | (657) | CGCGGATCGCTGAAATAAAC                               | -----                | TCGACCG--GATCA |
| pIFN(H3.3).3 | (407) | CGCGGATCGCTGAAATAAAC                               | -----                | T---CGAGGATCA  |
|              |       | 770                                                |                      | 819            |
| 1 A.th       | (291) | TGAGCGGAGAATTAAGGGAGTCACGTTATGACCCCCGCCGATGACGCGGG |                      |                |
| 6 A.th       | (679) | TGAGCGGAGAATTAAGGGAGTCACGTTATGACCCCCGCCGATGACGCGGG |                      |                |
| 38 A.th      | (749) | TGAGCGGAGAATTAAGGGAGTCACGTTATGACCCCCGCCGATGACGCGGG |                      |                |
| 4 A.th       | (689) | TGAGCGGAGAATTAAGGGAGTCACGTTATGACCCCCGCCGATGACGCGGG |                      |                |
| pIFN(H3.3).3 | (437) | TGAGCGGAGAATTAAGGGAGTCACGTTATGACCCCCGCCGATGACGCGGG |                      |                |
|              |       | 820                                                |                      | 869            |
| 1 A.th       | (341) | ACAAGCCGTTTTACGTTTGGAACTGACAGAACC                  | GCAACGTTGAAGGAGCC    |                |
| 6 A.th       | (729) | ACAAGCCGTTTTACGTTTGGAACTGACAGAACC                  | GCAACGTTGAAGGAGCC    |                |
| 38 A.th      | (799) | ACAAGCCGTTTTACGTTTGGAACTGACAGAACC                  | GCAACGTTGAAGGAGCC    |                |
| 4 A.th       | (739) | ACAAGCCGTTTTACGTTTGGAACTGACAGAACC                  | GCAACGTTGAAGGAGCC    |                |
| pIFN(H3.3).3 | (487) | ACAAGCCGTTTTACGTTTGGAACTGACAGAACC                  | GCAACGTTGAAGGAGCC    |                |
|              |       | 870                                                |                      | 913            |
| 1 A.th       | (391) | ACTCAGCCGCGGGTTTCTGGAGTTTAATGAGCTAAGCACATACG       |                      |                |
| 6 A.th       | (779) | ACTCAGCCGCGGGTTTCTGGAGTTTAATGAGCTAAGCACATACG       |                      |                |
| 38 A.th      | (849) | ACTCAGCCGCGGGTTTCTGGAGTTTAATGAGCTAAGCACATACG       |                      |                |
| 4 A.th       | (789) | ACTCAGCCGCGGGTTTCTGGAGTTTAATGAGCTAAGCACATACG       |                      |                |
| pIFN(H3.3).3 | (537) | ACTCAGCCGCGGGTTTCTGGAGTTTAATGAGCTAAGCACATACG       |                      |                |
